# Supplementary material for: Characterizing a visual lateral flow device for rapid SARS-CoV-2 virus protein detection: pre-clinical and system assessment
Source: Royal Society of Chemistry journal article supplement (doi:10.1039/d3ay02075d), 2024-01-01
Supplement: d3ay02075d1.pdf [file d3ay02075d1.pdf]

1 **Electronic Supplementary Information (ESI)**

2 **Characterizing a visual lateral flow device for rapid SARS-CoV-2 virus protein detection:**  
3 **pre-clinical and system assessment**

4 Natpapas Wiriyaichai<sup>\*a</sup>, Jetnapang Kongrueng<sup>a</sup>, Kannika Sukkuea<sup>a</sup>, Rattana  
5 Tanrattanawong<sup>a</sup>, Jarunee Vanichtanankul<sup>b</sup>, Thanaya Saeyang<sup>b</sup>, Tararat Jantra<sup>b</sup>, Deanpen  
6 Japrun<sup>a</sup>, Weerakanya Maneeprakorn<sup>a</sup>, Suwussa Bamrungsap<sup>a</sup>, Pareena Janchompoo<sup>c</sup> and  
7 Ekawat Pasomsub<sup>c</sup>

8

9

10

11

12

13

14

15

16

17

18

19

20

21

22

23

24

25

## 26 **Experimental**

### 27 *Characterization of gold nanoparticle and the MAbs-GNP conjugate nanoprobe*

28 To study the morphology and the size of the particles using TEM technique, the  
29 particles were diluted with distilled water in a 1:24 ratio and mixed for homogenization.  
30 Twenty microliters of the suspension were dropped into the carbon-coated 300 mesh copper  
31 TEM film grid and dried at 37 °C for 30 min. Subsequently, the grid of each sample was placed  
32 into the sample holder to begin measurement, and the TEM images were obtained by  
33 Transmission electron microscope (HT7800, HITACHI, Japan), with a voltage of 80 kV.

34 The hydrodynamic radius distribution and the zeta potential of the nanoparticles were  
35 measured using the DLS technique. The particle samples were diluted with distilled water, and  
36 a volume of 750 µl of sample suspensions in a microvolume quartz cuvette was performed  
37 triplicately for each sample at 25 °C using a DLS instrument (Zetasizer Nano ZS, Malvern,  
38 UK), with a wavelength of 633 nm of a helium-neon laser at an angle of 173.

39 UV-Vis spectroscopy was used to investigate the maximum absorption peak ( $A_{\max}$ )  
40 value of the nanoparticles before and after conjugation. Briefly, a volume of 90 µl of each  
41 particle sample was transferred in triplicate, to a 96-well plate. UV-Vis absorption spectra of  
42 the nanoparticles were obtained at 25 °C in a wavelength range of 400-900 nm with 2 nm  
43 resolution using a microplate reader (Power wave XS2, Bio-Tek, USA).

44

45

46

47

48

49

50

51 **Figure S1** A representative EDX spectra of elements obtained from (a) the test line (TL) of  
52 positive and (b) negative samples.

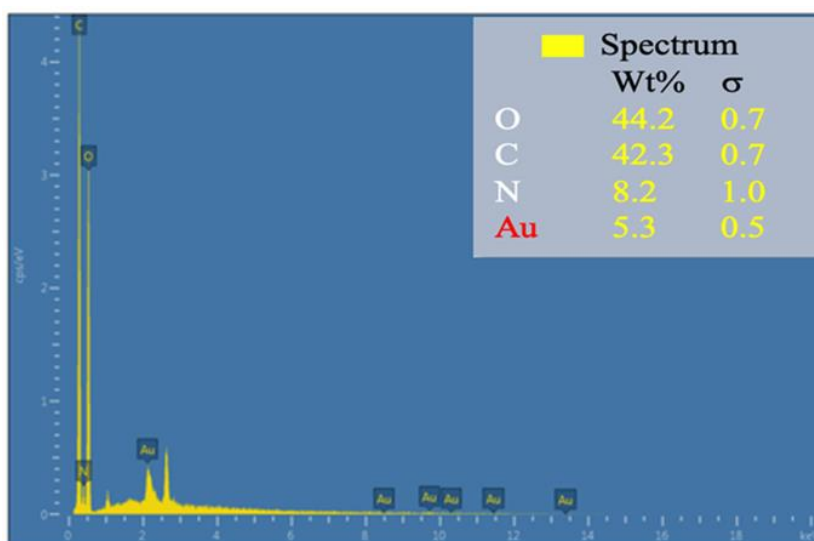

53

54

(A)

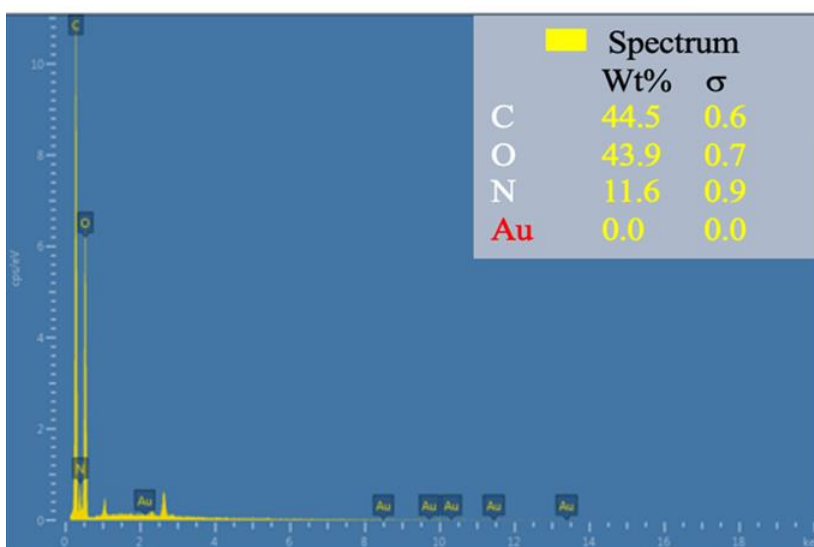

55

56

(B)

57

58

59

60

61

62 **Figure S2** The change in size distribution, surface charge, and absorption spectra of the  
 63 particles before and after conjugation, using TEM, DLS, UV-vis absorption spectra analyses.  
 64 TEM images of gold nanoparticles (a) before, (b) after conjugation, and (c) in a presence of  
 65 high salt concentration. *UV-vis* absorption spectra (d) of the particles at different conditions  
 66 were demonstrated.

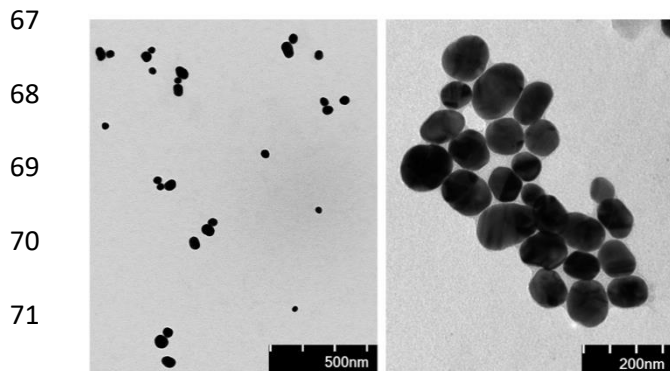

|     |                |     |                 |
|-----|----------------|-----|-----------------|
| TEM | Size (nm)      | DLS | Charge (mV)     |
|     | $30.2 \pm 4.7$ |     | $-33.1 \pm 2.5$ |

74 (A)

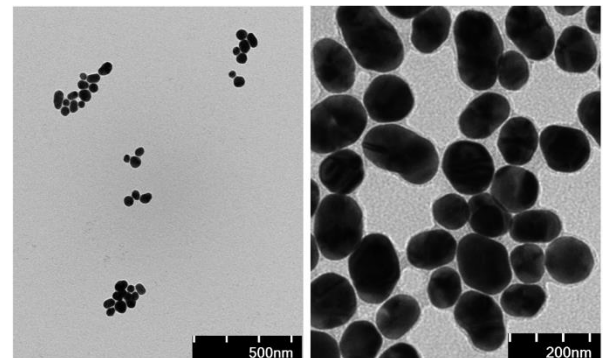

|     |                |     |                 |
|-----|----------------|-----|-----------------|
| TEM | Size (nm)      | DLS | Charge (mV)     |
|     | $45.3 \pm 4.7$ |     | $-13.8 \pm 1.5$ |

74 (B)

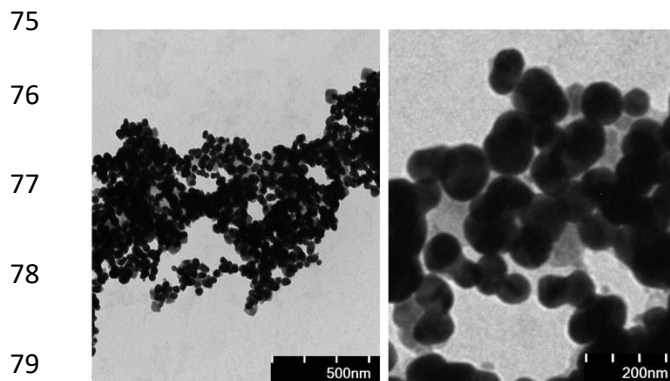

|     |                |     |                 |
|-----|----------------|-----|-----------------|
| TEM | Size (nm)      | DLS | Charge (mV)     |
|     | $81.3 \pm 8.6$ |     | $-34.4 \pm 0.9$ |

81 (C)

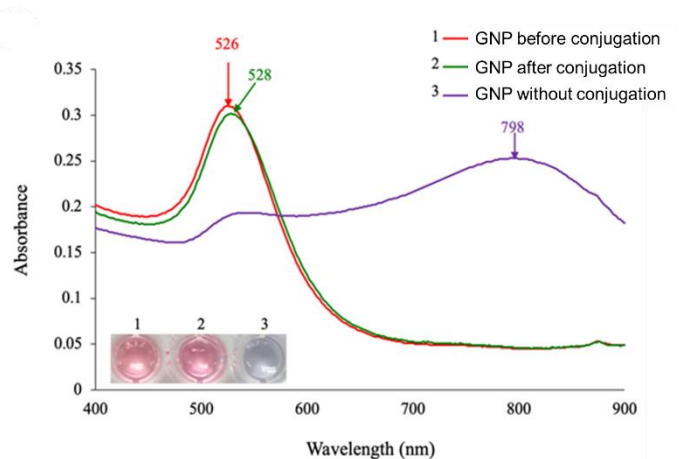

81 (D)

82  
83  
84

85 **Figure S3** Coomassie staining of (a) 10 % SDS-PAGE of SARS-CoV-2 nucleocapsid protein  
86 and other closely related and non-related viral recombinant proteins and (b) Western blot  
87 analysis with primary antibody specific to SARS-CoV-2 nucleocapsid protein. Lane M:  
88 Ladder; Lane 1: Storage buffer (negative control); Lane 2: Recombinant SARS-CoV-2  
89 nucleocapsid protein; Lane 3: SARS-CoV-2 spike protein; Lane 4: SARS-CoV nucleocapsid  
90 protein; Lane 5: MERS-CoV nucleocapsid protein; Lane 6: CoV-229E nucleocapsid protein;  
91 Lane 7: CoV-NL63 nucleocapsid protein; Lane 8: Recombinant influenza A nucleoprotein;  
92 Lane 9 Inactivated influenza B infected cell lysate protein; Lane 10: Inactivated respiratory  
93 syncytial virus infected cell lysate protein; Lane 11: Inactivated adenovirus infected cell lysate  
94 protein; Lane 12: Inactivated parainfluenza infected cell lysate protein

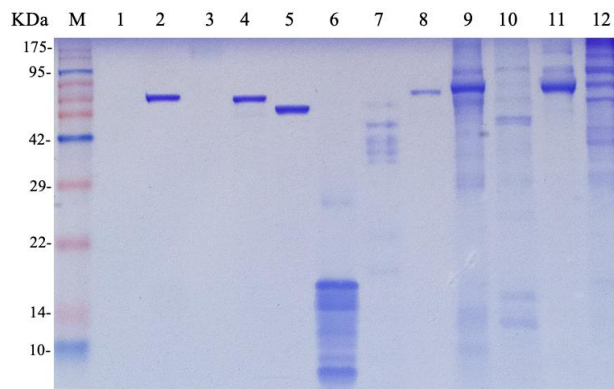

95

96

(A)

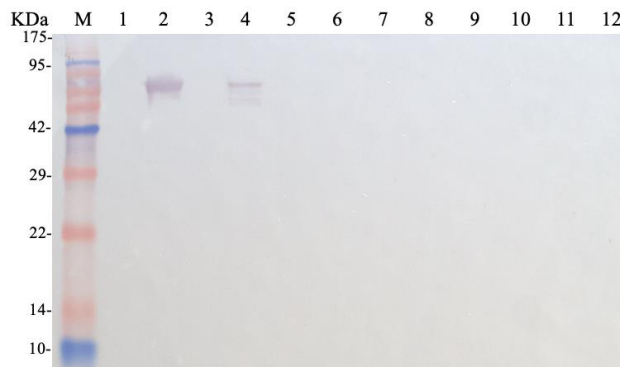

97

98

(B)

99

100

101 **Figure S4** Performance correlation of the system in detecting SARS-CoV-2 nucleocapsids with  
 102 other three commercially available rapid tests, including Test A and Test B (rapid test with  
 103 direct signal visualization), and Test C (fluorescence based rapid test). Both semi-quantitative  
 104 analysis (upper panel) and direct visualization (lower panel) revealed the performance of the  
 105 developed system with the least limit of detection at 0.07 ng/test, compared to those of  
 106 commercial Test A, B, and C (fluorescence-based test). With Test C, the result was obtained  
 107 only in positive and negative format result, according to the instruction manual.

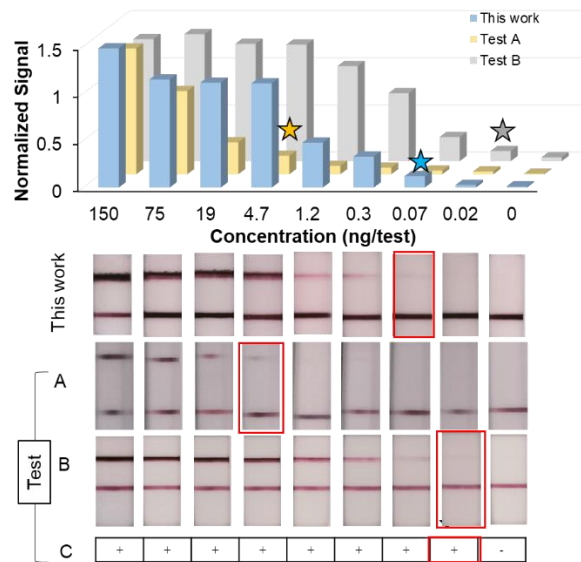

108  
 109  
 110  
 111  
 112  
 113  
 114  
 115  
 116

117 **Table S1** Calculation of diagnostic parameters, including estimated sensitivity and specificity,  
 118 predictive value of positive (PPV) and negative (NPV) results, and accuracy.

| <b>This work</b>             | <b>Reference method (Real-time RT-PCR)</b>  |                                                | <b>Total</b> |
|------------------------------|---------------------------------------------|------------------------------------------------|--------------|
|                              | Condition Present                           | Condition Absent                               |              |
| Positive                     | True Positive (TP)                          | False Positive (FP)                            | TP + FP      |
| Negative                     | False Negative (FN)                         | True Negative (TN)                             | FN + TN      |
| Total                        | TP + FN                                     | FP + TN                                        | All samples  |
| <b>Parameter Calculation</b> |                                             |                                                |              |
|                              | Estimated sensitivity                       | $100\% \times TP / (TP + FN)$                  |              |
|                              | Estimated specificity                       | $100\% \times TN / (FP + TN)$                  |              |
|                              | Predictive value of a positive result (PPV) | $100\% \times TP / (TP + FP)$                  |              |
|                              | Predictive value of a negative result (NPV) | $100\% \times TN / (FN + TN)$                  |              |
|                              | Accuracy                                    | $100\% \times (TP + TN) / (TP + FN + FP + TN)$ |              |

119  
 120  
 121  
 122  
 123  
 124  
 125  
 126  
 127  
 128  
 129  
 130  
 131

132 **Table S2** Preclinical evaluation of the system. Estimated sensitivity and specificity, predictive  
 133 value of positive (PPV) and negative (NPV) results, and accuracy were shown.

| This work                                   | Reference method (Real-time RT-PCR)                       |                  | Total |
|---------------------------------------------|-----------------------------------------------------------|------------------|-------|
|                                             | Condition Present                                         | Condition Absent |       |
| Positive                                    | 49                                                        | 0                | 49    |
| Negative                                    | 1                                                         | 100              | 101   |
| Total                                       | 50                                                        | 100              | 150   |
| <b>Parameter Calculation</b>                |                                                           |                  |       |
| Estimated sensitivity                       | $100\% \times 49 / (49 + 1) = 98\%$                       |                  |       |
| Estimated specificity                       | $100\% \times 100 / (0 + 100) = 100\%$                    |                  |       |
| Predictive value of a positive result (PPV) | $100\% \times 49 / (49 + 0) = 100\%$                      |                  |       |
| Predictive value of a negative result (NPV) | $100\% \times 100 / (1 + 100) = 99.001\%$                 |                  |       |
| Accuracy                                    | $100\% \times (49 + 100) / (49 + 1 + 0 + 100) = 99.330\%$ |                  |       |

134

135

136

137

138

139

140

141

142

143

144

145

146

147



148 **Table S3** Summary of recent LFIA-based and other approach as platforms for a detection of  
149 SARS-CoV-2 nucleocapsid protein (Please see references for Table S3 at the bottom of the  
150 page)  
151

| Biosensor                                                                                              | Biomarker | LOD/Performance                                                                        | Detection time | Advantages                                                                                                          | References |
|--------------------------------------------------------------------------------------------------------|-----------|----------------------------------------------------------------------------------------|----------------|---------------------------------------------------------------------------------------------------------------------|------------|
| <b>LFIA platform – colorimetric detection</b>                                                          |           |                                                                                        |                |                                                                                                                     |            |
| This work                                                                                              | N protein | LOD 0.7 ng.mL <sup>-1</sup><br>Sensitivity: 98%, Specificity: 100%                     | 15 min         | -Rapid screening (15 min) & simple procedure<br>-Direct visualization<br>-First Screening (POC test)                | This work  |
| Previous works                                                                                         |           | LOD 2 ng.mL <sup>-1</sup> , 50 PFU/Test<br>Sensitivity: 85-98.6%, Specificity: 86-100% |                |                                                                                                                     | (1), (2)   |
| <b>LFIA platform with other detection strategies (fluorescent, SERS, etc.)</b>                         |           |                                                                                        |                |                                                                                                                     |            |
| Fluorescent                                                                                            | N protein | LOD 0.01 ng.mL <sup>-1</sup>                                                           | 15-30 min      | -Automated and user-independent analyzer                                                                            | (3)        |
| SERS-based                                                                                             |           | LOD 500 pfu.mL <sup>-1</sup>                                                           | N/A            | -High sensitivity, selectivity, reproducibility, and stability of the SERS platform<br>-Reduces false-negative rate | (4)        |
| <b>LFIA platform integrated with nucleic acid amplifications methods (RPA, LAMP, CRISPR-Cas, etc.)</b> |           |                                                                                        |                |                                                                                                                     |            |
| LFIA with RPA                                                                                          | N gene    | LOD 0.25 copies.mL <sup>-1</sup> , 10 copies/reaction                                  | 10-60 min      | - 100% accuracy in detecting SARS-CoV-2<br>- Accurate detection with no cross reactivity                            | (5), (6)   |
| LFIA with LAMP                                                                                         |           | LOD 500 copies.mL <sup>-1</sup> ,<br>Sensitivity: 87.1% Specificity: 100%              | 30 min         | -Enables sensitive and reproducible detection of SARS-CoV-2.                                                        | (7)        |
| LFIA with CRISPR-Cas                                                                                   |           | LOD 10 copies/test                                                                     | 1 h            | -Consistent with RT-qPCR for clinical samples.<br>-Can be applied in quantitative analysis of the virus             | (8)        |
| <b>Non-LFIA based platforms</b>                                                                        |           |                                                                                        |                |                                                                                                                     |            |
| <b>Molecular Approach</b>                                                                              |           |                                                                                        |                |                                                                                                                     |            |
| RT-PCR                                                                                                 | N gene    | LOD 250-500 copies.mL <sup>-1</sup>                                                    | 1-4 h          | -Gold standard for COVID-19 testing.                                                                                | (9)        |
| RT-MCDA                                                                                                |           | LOD 5-6.8 copies/reaction<br>Specificity: 100%                                         | 1 h            | -High sensitivity & specificity.<br>-Can be coupled with a nanoparticle-based biosensor                             | (10), (11) |
| LAMP                                                                                                   |           | LOD 1-10 copies/reaction                                                               | 1 h            | - Increased sensitivity and specificity compared to RT-PCR                                                          | (12)       |

|                                                                                   |           |                                                                                                                                                              |           |                                                                                                                                                                                                 |            |
|-----------------------------------------------------------------------------------|-----------|--------------------------------------------------------------------------------------------------------------------------------------------------------------|-----------|-------------------------------------------------------------------------------------------------------------------------------------------------------------------------------------------------|------------|
| CRISPR-Cas                                                                        |           | LOD 10 copies/reaction                                                                                                                                       | 30-90 min | -Portable nucleic acid-testing platform for early diagnosis<br>-High sensitivity, selectivity, and low-cost                                                                                     | (13)       |
| <b>Other platforms (i.e., electrochemical, optical-based, SERS-based methods)</b> |           |                                                                                                                                                              |           |                                                                                                                                                                                                 |            |
| Electrochemical immunosensor                                                      | N protein | LOD 0.4-0.8 pg.mL <sup>-1</sup>                                                                                                                              | >15 min   | - Low-cost and fast diagnostic tool<br>-Initial testing results correlated with RT-PCR results.                                                                                                 | (14), (15) |
| Optical-based methods                                                             |           | - <i>Microcantilever-based optical sensor</i> : LOD 0.71 ng.mL <sup>-1</sup><br>- <i>Optical Fiber Based Sensor Method</i> : LOD 100 copies.mL <sup>-1</sup> | 5-15 min  | -Rapid, precise & sensitive detection of SARS-CoV-2 protein<br>- Provide quantitative and qualitative assessments.                                                                              | (16), (17) |
| SERS-based biosensor                                                              |           | LOD 10 <sup>-6</sup> g.mL <sup>-1</sup>                                                                                                                      | N/A       | -Long-range SERS biosensor for Simultaneous detection of SARS-CoV-2 nucleocapsid proteins.<br>-High sensitivity, selectivity, reproducibility, and stability in human saliva and serum samples. | (18)       |

### References (Table S3)

- (1) D.R.P. Nicollete, R. Benedetti, B.A. Valença, K.K. Kuniyoshi, T.C. Schuartz de Jesus, A. Gevaerd, E.B. Santiago, B.M. Machado de Almeida, S.R. Rogal Júnior and M.V.M. Figueredo, *Sci Rep*, 2023, <https://doi.org/10.1038/s41598-023-31641-5>.
- (2) S. Pickering, R. Batra, B. Merrick, L.B. Snell, G. Nebbia, S. Douthwaite, F. Reid, A. Patel, M.T. Kia Ik, B. Patel, T. Charalampous, A. Medina, M.J. Lista, P.R. Cliff, E. Cunningham, J. Mullen, K.J. Doores, J.D. Edgeworth, M.H. Malim, S.J.D. Neil and R.P. Galão, *Lancet Microbe*, 2021, doi: 10.1016/S2666-5247(21)00143-9.
- (3) W. Chen, H. Chen, Y. Liu, H. Wei, Y. Wang, Z. Rong and X. Liu, *Anal Biochem*, 2022, doi: 10.1016/j.ab.2022.
- (4) M. Lu, Y. J. Oung, C.S. Jeon, S. Kim, D. Yong, H. Jang, S. H. Pyun, T. Kang and J. Choo, *Nano Converg.*, 2022, <https://doi.org/10.1186/s40580-022-00330-w>.
- (5) T.R. Shelite, A.C. Uscanga-Palomeque, A. Castellanos-Gonzalez, P.C. Melby and B.L. Travi, *J Virol Methods*, 2021, doi: 10.1016/j.jviromet.2021.114227.
- (6) Y. Sun, P. Qin, J. He, W. Li, Y. Shi, J. Xu, Q. Wu, Q. Chen, W. Li, X. Wang, G. Liu and W. Chen, *Biosens Bioelectron*, 2022, doi: 10.1016/j.bios.2021.113771.
- (7) J. Tang, J. Zhu, J. Wang, H. Qian, Z. Liu, R. Wang, Q. Cai, Y. Fang and W. Huang, *BMC Infect Dis*, 2024, doi: 10.1186/s12879-023-08924-3.
- (8) G. Su, M. Zhu, D. Li, M. Xu, Y. Zhu, Y. Zhang, H. Zhu, F. Li and Y. Yu, *Sens Actuators B Chem*, 2022, doi: 10.1016/j.snb.2022.132537.
- (9) E. Kudo, B. Israelow, C.B.F. Vogels, P. Lu, A.L. Wyllie, M. Tokuyama, A. Venkataraman, D.E. Brackney, I.M. Ott, M.E. Petrone, R. Earnest, S. Lapidus, M.C. Muenker, A.J. Moore, A. C. Massana, Yale IMPACT Research Team; S.B. Omer, C.S.D. Cruz, S.F. Farhadian, A.I. Ko, N.D. Grubaugh and A. Iwasaki, *PLoS Biol*, 2020, doi: 10.1371/journal.pbio.3000867.
- (10) J. Huang, X. Yang, L. Ren, W. Jiang, Y. Huang, Y. Liu, C. Liu, X. Chen and S. Li, *J Med Virol*, 2023, doi: 10.1002/jmv.28444.
- (11) S. Li, W. Jiang, J. Huang, Y. Liu, L. Ren, L. Zhuang, Q. Zheng, M. Wang, R. Yang, Y. Zeng and Y. Wang, *Eur Respir J*, 2020, doi: 10.1183/13993003.02060-2020.
- (12) J. Kashir and A. Yaqinuddin, *Med Hypotheses*, 2020, doi: 10.1016/j.mehy.2020.
- (13) D. Huang, Z. Shi, J. Qian, K. Bi, M. Fang and Z. Xu, *Biotechnol Bioeng*, 2021, doi: 10.1002/bit.27673.
- (14) S. Eissa, H.A. Alhadrami, M. Al-Mozaini, A.M. Hassan and M. Zourob, *Microchim Acta*, 2021, <https://doi.org/10.1007/s00604-021-04867-1>.
- (15) S. Eissa and M. Zourob, *Anal Chem*, 2021, doi: 10.1021/acs.analchem.0c04719.
- (16) D.K. Agarwal, V. Nandwana, S.E. Henrich, V.P.V.N. Josyula, C.S. Thaxton, C. Qi, L.M. Simons, J.F. Hultquist, E.A. Ozer, G.S. Shekhawat and V.P. Dravid, *Biosens Bioelectron*, 2022, doi: 10.1016/j.bios.2021.113647.
- (17) M.U. Hadi and M. Khurshid, *Sensors (Basel)*, 2022, doi: 10.3390/s22030751.
- (18) Y. Dong, X. Yuan, K. Zhuang, Y. Li and X. Luo, *Anal Chim Acta*, 2024, doi: 10.1016/j.aca.2023.342070.
